# Supplementary material
Source: ML conference proceedings conference paper supplement (https://proceedings.neurips.cc/paper_files/paper/2023/hash/6e32c247076c2c0fb381e022c02d2c78-Abstract.html)
Supplement: Supplementary file 1 [file 6e32c247076c2c0fb381e022c02d2c78-Supplemental-Conference.pdf]

---

# Privately Counting Unique Elements

---

Anonymous Author(s)

Affiliation

Address

email

## Abstract

We study the problem of counting the number of unique elements in a dataset subject to the constraint of differential privacy. We consider the challenging setting of person-level DP (a.k.a. user-level DP) where each person may contribute an unbounded number of items and hence the sensitivity is unbounded.

Our approach is to compute a bounded-sensitivity version of this query, which reduces to solving a max-flow problem. The sensitivity bound is optimized to balance the noise we must add to privatize the answer against the error of the approximation of the bounded-sensitivity query to the true number of unique elements.

## 1 Introduction

An elementary data analysis task is to count the number of unique elements occurring in a dataset. The dataset may contain private data and even simple statistics can be combined to leak sensitive information about people [Dinur and Nissim, 2003]. Our goal is to release (an approximation to) this count in a way that ensures the privacy of the people who contributed their data. As a motivating example, consider a collection of internet browsing histories, in which case the goal is to compute the total number of websites that have been visited by at least one person.

Differential privacy (DP) [Dwork et al., 2006b] is a formal privacy standard. The simplest method for ensuring DP is to add noise (from either a Laplace or Gaussian distribution) to the true answer, where the scale of the noise corresponds to the sensitivity of the true answer – i.e., how much one person’s data can change the true value.

If each person contributes a single element to the dataset, then the sensitivity of the number of unique elements is one. However, a person may contribute multiple elements to the dataset and our goal is to ensure privacy for all of these contributions simultaneously. That is, we seek to provide person-level DP (a.k.a. user-level DP).

This is the problem we study: We have a dataset  $D = (u_1, u_2, \dots, u_n)$  of person records. Each person  $i \in [n]$  contributes a finite dataset  $u_i \in \Omega^*$ , where  $\Omega$  is some (possibly infinite) universe of potential elements (e.g., all finite-length binary strings) and  $\Omega^* := \bigcup_{\ell \in \mathbb{N}} \Omega^\ell$  denotes all subsets of  $\Omega$  of finite size. Informally, our goal is to compute the number of unique elements

$$\text{DC}(D) := \left| \bigcup_{i \in [n]} u_i \right| \tag{1}$$

in a way that preserves differential privacy. A priori, the sensitivity of this quantity is infinite, as a single person can contribute an unbounded number of unique elements.

In particular, it is not possible to give a meaningful upper bound on the number of distinct elements subject to differential privacy. However, it is possible to give a lower bound. Thus our formal goal

is to compute a high-confidence lower bound on the number of distinct elements that is as large as possible and which is computed in a differentially private manner.

## 1.1 Our Contributions

Given a dataset  $D = (u_1, \dots, u_n) \in (\Omega^*)^n$  and an integer  $\ell \geq 1$ , we define

$$\text{DC}(D; \ell) := \max \left\{ \left| \bigcup_{i \in [n]} v_i \right| : \forall i \in [n] \ v_i \subset u_i \wedge |v_i| \leq \ell \right\}. \quad (2)$$

That is,  $\text{DC}(D; \ell)$  is the number of distinct element if we restrict each person's contribution to  $\ell$  elements. We take the maximum over all possible restrictions.

It is immediate that  $\text{DC}(D; \ell) \leq \text{DC}(D)$  for all  $\ell \geq 1$ . Thus we obtain a lower bound on the true number of unique elements. The advantage of  $\text{DC}(D; \ell)$  is that its sensitivity is bounded by  $\ell$  and, hence, we can estimate it in a differentially private manner. Specifically,

$$\mathcal{M}_{\ell, \varepsilon}(D) := \text{DC}(D; \ell) + \text{Lap}(\ell/\varepsilon)$$

defines an  $\varepsilon$ -DP algorithm  $\mathcal{M}_{\ell, \varepsilon} : (\Omega^*)^n \rightarrow \mathbb{R}$ , where  $\text{Lap}(b)$  denotes Laplace noise scaled to have mean 0 and variance  $2b^2$ . This forms the basis of our algorithm. Two challenges remain: Setting the sensitivity parameter  $\ell$  and computing  $\text{DC}(D; \ell)$  efficiently.

**Choosing the sensitivity parameter  $\ell$ .** Any choice of  $\ell \geq 1$  gives us a lower bound:  $\text{DC}(D; \ell) \leq \text{DC}(D)$ . Since  $\forall D \lim_{\ell \rightarrow \infty} \text{DC}(D; \ell) = \text{DC}(D)$ , this lower bound can be arbitrarily tight. However, the larger  $\ell$  is, the larger the sensitivity of  $\text{DC}(D; \ell)$  is. That is, the noise we add scales linearly with  $\ell$ .

Thus there is a bias-variance tradeoff in the choice of  $\ell$ . To make this precise, suppose we want a lower bound on  $\text{DC}(D)$  with confidence  $1 - \beta \in [\frac{1}{2}, 1)$ . We can obtain such a lower bound from  $\mathcal{M}_{\ell}(D)$  using the cumulative distribution function (CDF) of the Laplace distribution:

$$\begin{aligned} \mathbb{P} \left[ \underbrace{\mathcal{M}_{\ell, \varepsilon}(D) - \frac{\ell}{\varepsilon} \cdot \log \left( \frac{1}{2\beta} \right)}_{\text{lower bound}} \leq \text{DC}(D) \right] &= \mathbb{P} \left[ \text{Lap}(\ell/\varepsilon) \leq \text{cdf}_{\text{Lap}(\ell/\varepsilon)}^{-1}(1 - \beta) + \text{DC}(D) - \text{DC}(D; \ell) \right] \\ &\geq \mathbb{P} \left[ \text{Lap}(\ell/\varepsilon) \leq \text{cdf}_{\text{Lap}(\ell/\varepsilon)}^{-1}(1 - \beta) + 0 \right] = \underbrace{1 - \beta}_{\text{confidence}}. \end{aligned}$$

Thus, to obtain the tightest possible lower bound with confidence  $1 - \beta$ , we choose  $\ell$  to maximize

$$q(D; \ell) := \text{DC}(D; \ell) - \frac{\ell}{\varepsilon} \cdot \log \left( \frac{1}{2\beta} \right).$$

We can use the exponential mechanism [McSherry and Talwar, 2007] to privately select  $\ell$  that approximately maximizes  $q(D; \ell)$ . However, directly applying the exponential mechanism is problematic because each score has a different sensitivity – the sensitivity of  $q(\cdot; \ell)$  is  $\ell$ . Instead, we apply the generalized exponential mechanism of Raskhodnikova and Smith [2015] (see Algorithm 3).

Our main algorithm attains the following guarantees.

**Theorem 1.1** (Theoretical Guarantees of Our Algorithm). *Let  $\varepsilon > 0$  and  $\beta \in (0, \frac{1}{2})$  and  $\ell_{\max} \in \mathbb{N}$ . Define  $\mathcal{M} : (\Omega^*)^n \rightarrow \mathbb{N} \times \mathbb{R}$  to be  $\mathcal{M}(D) = \text{DPDISTINCTCOUNT}(D; \ell_{\max}, \varepsilon, \beta)$  from Algorithm 1. Then  $\mathcal{M}$  satisfies all of the following properties.*

- **Privacy:**  $\mathcal{M}$  is  $\varepsilon$ -differentially private.
- **Lower bound:** For all  $D \in (\Omega^*)^n$ ,

$$\mathbb{P}_{(\hat{\ell}, \hat{\nu}) \leftarrow \mathcal{M}(D)} [\hat{\nu} \leq \text{DC}(D)] \geq 1 - \beta. \quad (3)$$

63 • **Upper bound** For all  $D \in (\Omega^*)^n$ ,

$$\mathbb{P}_{(\hat{\ell}, \hat{\nu}) \leftarrow \mathcal{M}(D)} \left[ \hat{\nu} \geq \max_{\ell \in [\ell_{\max}]} \text{DC}(D; \ell) - \frac{10\ell + 18\ell_A^*}{\varepsilon} \log \left( \frac{\ell_{\max}}{\beta} \right) \right] \geq 1 - 2\beta, \quad (4)$$

64 where  $\ell_A^* = \arg \max_{\ell \in [\ell_{\max}]} \text{DC}(D; \ell) - \frac{\ell}{\varepsilon} \log \left( \frac{1}{2\beta} \right)$ .

65 • **Computational efficiency:**  $\mathcal{M}(D)$  has running time  $O(|D|^{1.5} \cdot \ell_{\max}^2)$ , where  $|D| :=$   
66  $\sum_i |u_i|$ .

67 In particular, if  $D = (u_1, \dots, u_n) \in (\Omega^*)^n$  satisfies  $\max_{i \in [n]} |u_i| \leq \ell_* \leq \ell_{\max}$ , then combining  
68 the upper and lower bounds of Theorem 1.1 gives

$$\mathbb{P}_{(\hat{\ell}, \hat{\nu}) \leftarrow \mathcal{M}(D)} \left[ \text{DC}(D) \geq \hat{\nu} \geq \text{DC}(D) - \frac{28\ell_*}{\varepsilon} \log \left( \frac{\ell_{\max}}{\beta} \right) \right] \geq 1 - 3\beta. \quad (5)$$

69 In addition to proving the above theoretical guarantees, we perform an experimental evaluation of  
70 our algorithm.

---

**Algorithm 1** Distinct Count Algorithm

---

```

1: procedure SENSITIVEDISTINCTCOUNT( $D = (u_1, \dots, u_n) \in (\Omega^*)^n; \ell \in \mathbb{N}$ ) ▷  $\text{DC}(D; \ell)$ 
2:   Let  $U_\ell = \bigcup_{i \in [n]} (\{i\} \times [\min\{\ell, |u_i|\}]) \subset [n] \times [\ell]$ .
3:   Let  $V = \bigcup_{i \in [n]} u_i \subset \Omega$ .
4:   Define  $E_\ell \subseteq U_\ell \times V$  by  $((i, j), v) \in E_\ell \iff v \in u_i$ .
5:   Let  $G_\ell$  be a bipartite graph with vertices partitioned into  $U_\ell$  and  $V$  and edges  $E_\ell$ .
6:    $m_\ell \leftarrow \text{MAXIMUMMATCHINGSIZE}(G_\ell)$ . ▷ [Hopcroft and Karp, 1973, Karzanov, 1973]
7:   return  $m_\ell \in \mathbb{N}$ 
8: end procedure
9: procedure DPDISTINCTCOUNT( $D = (u_1, \dots, u_n) \in (\Omega^*)^n; \ell_{\max} \in \mathbb{N}, \varepsilon > 0, \beta \in (0, \frac{1}{2})$ )
10:  for  $\ell \in [\ell_{\max}]$  do
11:    Define  $q_\ell(D) := \text{SENSITIVEDISTINCTCOUNT}(D; \ell) - \frac{2\ell}{\varepsilon} \cdot \log \left( \frac{1}{2\beta} \right)$ .
12:  end for
13:   $\hat{\ell} \leftarrow \text{GEM}(D; \{q_\ell\}_{\ell \in [\ell_{\max}]}, \{\ell\}_{\ell \in [\ell_{\max}]}, \varepsilon/2, \beta)$ . ▷ Algorithm 3
14:   $\hat{\nu} \leftarrow q_{\hat{\ell}}(D) + \text{Lap} \left( 2\hat{\ell}/\varepsilon \right)$ .
15:  return  $(\hat{\ell}, \hat{\nu}) \in [\ell_{\max}] \times \mathbb{R}$ .
16: end procedure

```

---

71 **Efficient computation.** The main computational task for our algorithm is to compute  $\text{DC}(D; \ell)$ .  
72 By definition (2), this is an optimization problem. For each person  $i \in [n]$ , we must select a subset  
73  $v_i$  of that person's data  $u_i$  of size at most  $\ell$  so as to maximize the size of the union of the subsets  
74  $\left| \bigcup_{i \in [n]} v_i \right|$ .

75 We can view the dataset  $D = (u_1, \dots, u_n) \in (\Omega^*)^n$  as a bipartite graph. On one side we have the  $n$   
76 people and on the other side we have the elements of the data universe  $\Omega$ .<sup>1</sup> There is an edge between  
77  $i \in [n]$  and  $x \in \Omega$  if and only if  $x \in u_i$ .

78 We can reduce computing  $\text{DC}(D; \ell)$  to a max-flow problem: Each edge in the bipartite graph has  
79 capacity one. We add a source vertex  $s$  which is connected to each person  $i \in [n]$  by an edge with  
80 capacity  $\ell$ . Finally we add a sink  $t$  that is connected to each  $x \in \Omega$  by an edge with capacity 1. The  
81 max flow through this graph is precisely  $\text{DC}(D; \ell)$ .

82 Alternatively, we can reduce computing  $\text{DC}(D; \ell)$  to bipartite maximum matching. For  $\ell = 1$ ,  
83  $\text{DC}(D; 1)$  is exactly the maximum cardinality of a matching in the bipartite graph described above.

---

<sup>1</sup>The data universe  $\Omega$  may be infinite, but we can restrict the computation to the finite set  $\bigcup_{i \in [n]} u_i$ . Thus there are at most  $n + \text{DC}(D) \leq n + |D|$  item vertices in the graph.

84 For  $\ell \geq 2$ , we simply create  $\ell$  copies of each person vertex  $i \in [n]$  and then  $\text{DC}(D; \ell)$  is the  
 85 maximum cardinality of a matching in this new bipartite graph.<sup>2</sup>  
 86 Using this reduction, standard algorithms for bipartite maximum matching [Hopcroft and Karp,  
 87 1973, Karzanov, 1973] allow us to compute  $\text{DC}(D; \ell)$  with  $O(|D|^{1.5} \cdot \ell)$  operations. We must  
 88 repeat this computation for each  $\ell \in [\ell_{\max}]$ .

---

**Algorithm 2** Linear-Time Approximate Distinct Count Algorithm

---

```

1: procedure APPROXDPDISTINCTCOUNT( $D=(u_1, \dots, u_n) \in (\Omega^*)^n; \ell_{\max} \in \mathbb{N}, \varepsilon > 0, \beta \in (0, \frac{1}{2})$ )
2:    $S \leftarrow \emptyset$ .
3:   for  $\ell \in [\ell_{\max}]$  do
4:     for  $i \in [n]$  with  $u_i \setminus S \neq \emptyset$  do
5:       Choose lexicographically first  $v \in u_i \setminus S$ . ▷ Match  $(i, \ell)$  to  $v$ .
6:       Update  $S \leftarrow S \cup \{v\}$ .
7:     end for
8:     Define  $q_\ell(D) := |S| - \frac{2\ell}{\varepsilon} \cdot \log\left(\frac{1}{2\beta}\right)$ . ▷ This loop computes  $\{q_\ell(D)\}_{\ell \in [\ell_{\max}]}$ .
9:   end for
10:   $\hat{\ell} \leftarrow \text{GEM}(D; \{q_\ell\}_{\ell \in [\ell_{\max}]}, \{\ell\}_{\ell \in [\ell_{\max}]}, \varepsilon/2, \beta)$ . ▷ Algorithm 3
11:   $\hat{v} \leftarrow q_{\hat{\ell}}(D) + \text{Lap}\left(2\hat{\ell}/\varepsilon\right)$ .
12:  return  $(\hat{\ell}, \hat{v}) \in [\ell_{\max}] \times \mathbb{R}$ .
13: end procedure

```

---

89 **Linear-time algorithm.** Our algorithm above is polynomial-time. However, for many applica-  
 90 tions the dataset size  $|D|$  is enormous. Thus we also propose a linear-time variant of our algorithm.  
 91 However, we must trade accuracy for efficiency.

92 There are two key ideas that differentiate our linear-time algorithm (Algorithm 2) from our first  
 93 algorithm (Algorithm 1) above: First, we compute a maximal bipartite matching instead of a  
 94 maximum bipartite matching. This can be done using a linear-time greedy algorithm and gives a  
 95 2-approximation to the maximal matching. (Experimentally we find that the approximation is better  
 96 than a factor of 2.) Second, rather than repeating the computation from scratch for each  $\ell \in [\ell_{\max}]$ ,  
 97 we incrementally update our a maximal matching while increasing  $\ell$ . The main challenge here is  
 98 ensuring that the approximation to  $\text{DC}(D; \ell)$  has low sensitivity – i.e., we must ensure that our  
 99 approximation algorithm doesn't inflate the sensitivity. Note that  $\text{DC}(D; \ell)$  having low sensitivity  
 100 does not automatically ensure that the approximation has low sensitivity.

101 **Theorem 1.2** (Theoretical Guarantees of Our Linear-Time Algorithm). *Let  $\varepsilon > 0$  and*  
 102  *$\beta \in (0, \frac{1}{2})$  and  $\ell_{\max} \in \mathbb{N}$ . Define  $\mathcal{M} : (\Omega^*)^n \rightarrow \mathbb{N} \times \mathbb{R}$  to be  $\widehat{\mathcal{M}}(D) =$*   
 103  *$\text{APPROXDPDISTINCTCOUNT}(D; \ell_{\max}, \varepsilon, \beta)$  from Algorithm 2. Then  $\widehat{\mathcal{M}}$  satisfies all of the fol-*  
 104 *lowing properties.*

105 • **Privacy:**  $\widehat{\mathcal{M}}$  is  $\varepsilon$ -differentially private.

106 • **Lower bound:** For all  $D \in (\Omega^*)^n$ ,

$$\mathbb{P}_{(\hat{\ell}, \hat{v}) \leftarrow \widehat{\mathcal{M}}(D)} [\hat{v} \leq \text{DC}(D)] \geq 1 - \beta. \quad (6)$$

107 • **Upper bound:** If  $D = (u_1, \dots, u_n) \in (\Omega^*)^n$  satisfies  $\max_{i \in [n]} |u_i| \leq \ell_* \leq \ell_{\max}$ , then

$$\mathbb{P}_{(\hat{\ell}, \hat{v}) \leftarrow \widehat{\mathcal{M}}(D)} \left[ \hat{v} \geq \frac{1}{2} \text{DC}(D) - O\left(\frac{\ell_*}{\varepsilon} \log\left(\frac{\ell_{\max}}{\beta}\right)\right) \right] \geq 1 - 2\beta. \quad (7)$$

108 • **Computational efficiency:**  $\mathcal{M}(D)$  has running time  $O(|D|)$ , where  $|D| := \sum_i |u_i|$ .

---

<sup>2</sup>We need only create  $\min\{\ell, |u_i|\}$  copies of the person  $i \in [n]$ . Thus the number of person vertices is at most  $\min\{n\ell, |D|\}$ .

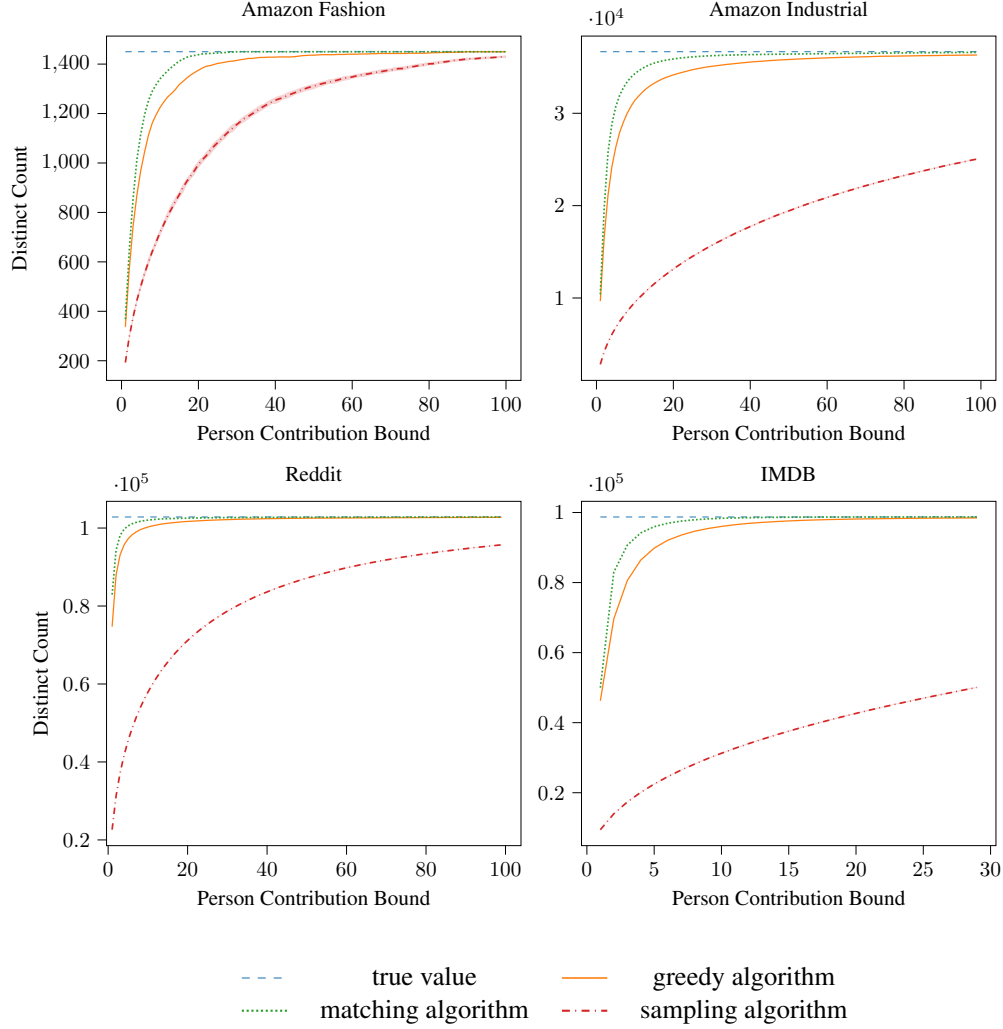

Figure 1: Performance of different algorithms estimating distinct count assuming that each person can contribute at most  $\ell$  elements.

## 2 Related Work

Counting the number of distinct elements in a collection is one of the most fundamental operations. Hence, unsurprisingly, the problem of computing the number of unique elements in a differentially private way has been extensively investigated.

In the case where we assume each person contributes only one element (a.k.a. event-level privacy), the number of distinct elements has sensitivity 1 and, hence, we can simply use Laplace (or Gaussian) noise addition to release. However, it may not be possible to compute the number of distinct elements exactly (e.g. in the local model of DP [Kasiviswanathan et al., 2011]).

Most efforts have been focused on creating differentially private approximation schemes for counting distinct elements. Desfontaines et al. [2019] proved that a number of existing approximate algorithms allow an attacker to test whether a particular individual is in the collection; therefore, creation of a differentially private scheme requires care. Nonetheless, Smith et al. [2020] proved that Flajolet-Martin Sketch is private by itself and Dickens et al. [2022] proved that several other cardinality estimators can be tweaked to make them private. In case of local and shuffle models the only known results are communication complexity bounds [Chen et al., 2021]. Counting unique elements has been considered in the streaming setting [Dwork et al., 2010, Ghazi et al., 2023].

A closely related problem is that of identifying as many elements as possible (rather than just counting them); this is known as “partition selection,” “set union,” and “key selection” [Swanberg et al., 2023, Desfontaines et al., 2022, Korolova et al., 2009, Carvalho et al., 2022, Rivera Cardoso and Rogers, 2022, Gopi et al., 2020, Zhang et al., 2023]. Note that, by design, DP prevents us from identifying elements that only appear once in the dataset, or only a few times. Thus we can only output items that appear frequently.

For our problem of counting the number of unique elements under person-level/user-level privacy, the only known algorithm is the algorithm where each user independently samples a subset of their elements to reduce the sensitivity. We use this as a baseline in our experiments and show that our algorithm outperforms it.

### 3 Technical Background on Differential Privacy

For detailed background on differential privacy, see the survey by Vadhan [2017] or the book by Dwork and Roth [2014]. We briefly define pure DP and some basic mechanisms and results.

---

**Algorithm 3** Generalized Exponential Mechanism [Raskhodnikova and Smith, 2015]

---

```

1: procedure GEM( $D \in \mathcal{X}^*$ ;  $q_i : \mathcal{X}^* \rightarrow \mathbb{R}$  for  $i \in [m]$ ,  $\Delta_i > 0$  for  $i \in [m]$ ,  $\varepsilon > 0$ ,  $\beta > 0$ )
2:   Require:  $q_i$  has sensitivity  $\sup_{x, x' \in \mathcal{X}^*} |q(x) - q(x')| \leq \Delta_i$  for all  $i \in [m]$ .
3:   Let  $t = \frac{2}{\varepsilon} \log \left( \frac{m}{\beta} \right)$ .
4:   for  $i \in [m]$  do
5:      $s_i \leftarrow \min_{j \in [m]} \frac{(q_i(D) - t\Delta_i) - (q_j(D) - t\Delta_j)}{\Delta_i + \Delta_j}$ .
6:   end for
7:   Sample  $\hat{i} \in [m]$  from the Exponential Mechanism using the normalized scores  $s_i$ ; i.e.,
      
$$\forall i \in [m] \quad \mathbb{P}[\hat{i} = i] = \frac{\exp\left(\frac{1}{2}\varepsilon s_i\right)}{\sum_{k \in [m]} \exp\left(\frac{1}{2}\varepsilon s_k\right)}.$$

8:   return  $\hat{i} \in [m]$ .
9: end procedure

```

---

**Definition 3.1** (Differential Privacy (DP) [Dwork et al., 2006b]). A randomized algorithm  $M : \mathcal{X}^* \rightarrow \mathcal{Y}$  satisfies  $\varepsilon$ -DP if, for all inputs  $D, D' \in \mathcal{X}^*$  differing only by the addition or removal of an element and for all measurable  $S \subset \mathcal{Y}$ , we have  $\mathbb{P}[M(D) \in S] \leq e^\varepsilon \cdot \mathbb{P}[M(D') \in S]$ .

We refer to pairs of inputs that differ only by the addition or removal of one person’s data as *neighboring*. Note that it is common to also consider replacement of one person’s data; for simplicity, we do not do this. We remark that there are also variants of DP such as approximate DP [Dwork et al., 2006a] and concentrated DP [Dwork and Rothblum, 2016, Bun and Steinke, 2016], which quantitatively relax the definition, but these are not relevant in our application. A key property of DP is that it composes and is invariant under postprocessing.

**Lemma 3.2** (Composition & Postprocessing). Let  $M_1 : \mathcal{X}^* \rightarrow \mathcal{Y}$  be  $\varepsilon_1$ -DP. Let  $M_2 : \mathcal{X}^* \times \mathcal{Y} \rightarrow \mathcal{Z}$  be such that, for all  $y \in \mathcal{Y}$ , the restriction  $M(\cdot, y) : \mathcal{X}^* \rightarrow \mathcal{Z}$  is  $\varepsilon_2$ -DP. Define  $M_{12} : \mathcal{X}^* \rightarrow \mathcal{Z}$  by  $M_{12}(D) = M_2(D, M_1(D))$ . Then  $M_{12}$  is  $(\varepsilon_1 + \varepsilon_2)$ -DP.

A basic DP tool is the Laplace mechanism [Dwork et al., 2006b]. Note that we could also use the discrete Laplace mechanism [Ghosh et al., 2009, Canonne et al., 2020].

**Lemma 3.3** (Laplace Mechanism). Let  $q : \mathcal{X}^* \rightarrow \mathbb{R}$ . We say  $q$  has sensitivity  $\Delta$  if  $|q(D) - q(D')| \leq \Delta$  for all neighboring  $D, D' \in \mathcal{X}^*$ . Define  $M : \mathcal{X}^* \rightarrow \mathbb{R}$  by  $M(D) = q(D) + \text{Lap}(\Delta/\varepsilon)$ , where  $\text{Lap}(b)$  denotes laplace noise with mean 0 and variance  $2b^2$  – i.e.,  $\mathbb{P}_{\xi \leftarrow \text{Lap}(b)}[\xi > t] = \frac{1}{2} \exp\left(-\frac{|t|}{b}\right)$  for all  $t > 0$ . Then  $M$  is  $\varepsilon$ -DP.

Another fundamental tool for DP is the exponential mechanism [McSherry and Talwar, 2007]. It selects the approximately best option from among a set of options, where each option  $i$  has a quality function  $q_i$  with sensitivity  $\Delta$ . The following result generalizes the exponential mechanism by allowing each of the quality functions to have a different sensitivity.

| Data Set                         | Size   |         | Words per Person |        |      | Vocabulary Size |
|----------------------------------|--------|---------|------------------|--------|------|-----------------|
|                                  | People | Records | Min              | Median | Max  |                 |
| Amazon Fashion                   | 404    | 8533    | 1                | 14.0   | 139  | 1450            |
| Amazon Industrial and Scientific | 11041  | 1446031 | 0                | 86     | 2059 | 36665           |
| Reddit                           | 223388 | 7117494 | 0                | 18.0   | 1724 | 102835          |
| IMDB                             | 50000  | 6688844 | 5                | 110.0  | 925  | 98726           |

Table 1: Data sets details.

**Theorem 3.4** (Generalized Exponential Mechanism [Raskhodnikova and Smith, 2015, Theorem 1.4]). *For each  $i \in [m]$ , let  $q_i : \mathcal{X}^* \rightarrow \mathbb{R}$  be a query with sensitivity  $\Delta_i$ . Let  $\varepsilon, \beta > 0$ . The generalized exponential mechanism ( $\text{GEM}(\cdot; \{q_i\}_{i \in [m]}, \{\Delta_i\}_{i \in [m]}, \varepsilon, \beta)$  in Algorithm 3) is  $\varepsilon$ -DP and has the following utility guarantee. For all  $D \in \mathcal{X}^*$ , we have*

$$\mathbb{P}_{\hat{i} \leftarrow \text{GEM}(D; \{q_i\}_{i \in [m]}, \{\Delta_i\}_{i \in [m]}, \varepsilon, \beta)} \left[ q_{\hat{i}}(D) \geq \max_{j \in [m]} q_j(D) - \Delta_j \cdot \frac{4}{\varepsilon} \log \left( \frac{m}{\beta} \right) \right] \geq 1 - \beta.$$

## 4 Experimental Results

We empirically validate the performance of our algorithms using data sets of various sizes from different text domains. We focus on the problem of computing vocabulary size with person-level DP. Section 4.1 describes the data sets and Section 4.2 discusses the algorithms we compare.

### 4.1 Datasets

We used four publicly available datasets to assess the accuracy of our algorithms compared to baselines. Two small datasets were used: Amazon Fashion 5-core [Ni et al., 2019] (reviews of fashion products on Amazon) and Amazon Industrial and Scientific 5-core [Ni et al., 2019] (reviews of industrial and scientific products on Amazon). Two large data sets were also used: Reddit [Shen, 2020] (a data set of posts collected from r/AskReddit) and IMDb [N, 2020, Maas et al., 2011] (a set of movie reviews scraped from IMDb). See details of the datasets in Table 1.

### 4.2 Comparisons

Computing the number of distinct elements using a differentially private mechanism involves two steps: selecting a contribution bound ( $\ell$  in our algorithms) and counting the number of distinct elements in a way that restricts each person to only contribute the given number of elements.

**Selection:** We examine three algorithms for determining the contribution limit:

1. Choosing the true maximum person contribution (due to computational restrictions this was only computed for Amazon Fashion data set).
2. Choosing the 90th percentile of person contributions.
3. Choosing the person contribution that maximizes the utility function  $q_\ell(D) = \text{DC}(D; \ell) - \frac{\ell}{\varepsilon} \log(\frac{1}{2\beta})$ , where  $\varepsilon = 1$ , and  $\beta = 0.001$ .
4. Choosing the person contribution that maximizes the utility function using generalized exponential mechanism with  $\epsilon = 1$ .

Note that only the last option is differentially private, but we consider the other comparison points nonetheless.

**Counting:** We also consider three algorithms for estimating the number of distinct elements for a given sensitivity bound  $\ell$ :

1. For each person, we independently sample  $\ell$  elements and count the number of distinct elements in the union of the samples.

| Selection       | Counting    | Person Contribution Bound |        |         | Distinct Count |        |         |
|-----------------|-------------|---------------------------|--------|---------|----------------|--------|---------|
|                 |             | 10th PC                   | Median | 90th PC | 10th PC        | Median | 90th PC |
| Max Contrib     | DP Sampling | –                         | 139    | –       | 1196.8         | 1407.5 | 1649.1  |
| Max Contrib     | DP Greedy   | –                         | 139    | –       | 1174.2         | 1439.2 | 1646.5  |
| Max Contrib     | DP Matching | –                         | 139    | –       | 1222.2         | 1460.9 | 1631.0  |
| 90th PC Contrib | DP Sampling | –                         | 48     | –       | 1225.4         | 1296.2 | 1377.9  |
| 90th PC Contrib | DP Greedy   | –                         | 48     | –       | 1367.0         | 1432.6 | 1516.3  |
| 90th PC Contrib | DP Matching | –                         | 48     | –       | 1365.3         | 1444.7 | 1524.8  |
| Max Utility     | Sampling    | –                         | 41     | –       | 1247.0         | 1259.0 | 1270.0  |
| Max Utility     | Greedy      | –                         | 20     | –       | –              | 1376   | –       |
| Max Utility     | Matching    | –                         | 17     | –       | –              | 1428   | –       |
| DP Max Utility  | Sampling    | 8.9                       | 16.0   | 28.0    | 661.6          | 892.5  | 1124.5  |
| DP Max Utility  | Greedy      | 8.0                       | 11.0   | 17.0    | 1148.0         | 1241.0 | 1348.0  |
| DP Max Utility  | Matching    | 7.0                       | 9.0    | 14.0    | 1252.0         | 1317.0 | 1400.0  |
| DP Max Utility  | DP Sampling | 9.0                       | 16.0   | 27.1    | 702.4          | 899.1  | 1145.1  |
| DP Max Utility  | DP Greedy   | 8.0                       | 10.0   | 19.0    | 1128.5         | 1224.4 | 1370.8  |
| DP Max Utility  | DP Matching | 6.9                       | 9.0    | 13.1    | 1220.6         | 1319.1 | 1394.2  |

Table 2: Amazon Fashion: the comparison is for  $\ell_{\max} = 100$ .

| Selection       | Counting    | Person Contribution Bound |        |         | Distinct Count |         |         |
|-----------------|-------------|---------------------------|--------|---------|----------------|---------|---------|
|                 |             | 10th PC                   | Median | 90th PC | 10th PC        | Median  | 90th PC |
| 90th PC Contrib | DP Sampling | –                         | 297    | –       | 32458.1        | 32943.8 | 33452.6 |
| 90th PC Contrib | DP Greedy   | –                         | 297    | –       | 36270.3        | 36669.5 | 37019.0 |
| 90th PC Contrib | DP Matching | –                         | 297    | –       | 36236.2        | 36651.7 | 37102.7 |
| Max Utility     | Sampling    | –                         | 99     | –       | 24967.0        | 25039.0 | 25121.2 |
| Max Utility     | Greedy      | –                         | 79     | –       | –              | 36246   | –       |
| Max Utility     | Matching    | –                         | 42     | –       | –              | 36364   | –       |
| DP Max Utility  | Sampling    | 85.9                      | 96.0   | 99.0    | 23852.8        | 24739.0 | 25049.8 |
| DP Max Utility  | Greedy      | 34.0                      | 49.0   | 66.1    | 35393.0        | 35839.0 | 36116.9 |
| DP Max Utility  | Matching    | 22.9                      | 30.5   | 43.2    | 36026.8        | 36243.5 | 36371.2 |
| DP Max Utility  | DP Sampling | 87.0                      | 95.0   | 99.0    | 23997.6        | 24701.1 | 25067.7 |
| DP Max Utility  | DP Greedy   | 32.9                      | 47.5   | 68.0    | 35336.6        | 35776.2 | 36136.6 |
| DP Max Utility  | DP Matching | 22.0                      | 28.0   | 38.0    | 35970.5        | 36198.9 | 36326.7 |

Table 3: Amazon Industrial and Scientific: the comparison is for  $\ell_{\max} = 100$ .

193 2. The linear-time greedy algorithm (Algorithm 2) with  $\varepsilon = 1$  and  $\beta = 0.001$ .

194 3. The matching-based algorithm (Algorithm 1) with  $\varepsilon = 1$  and  $\beta = 0.001$ .

195 All of these can be converted into DP algorithms by adding Laplace noise to the result.

196 In all our datasets “true maximum person contribution” and “90th percentile of person contributions”  
197 output bounds that are much larger than necessary to obtain true distinct count; hence, we only  
198 consider DP versions of the estimation algorithm for these selection algorithms.

### 199 4.3 Results

200 Figure 1 shows the dependency of the result on the contribution bound for each of the algorithms for  
201 computing the number of distinct elements with fixed person contribution. It is clear that matching  
202 and greedy algorithms vastly outperform the sampling approach that is currently used in practice.

203 Tables 2 to 5 show the performance of algorithms for selecting optimal person contribution bounds  
204 on different data sets. For all bound selection algorithms and all data sets, the sampling approach to

| Selection       | Counting    | Person Contribution Bound |        |         | Distinct Count |          |          |
|-----------------|-------------|---------------------------|--------|---------|----------------|----------|----------|
|                 |             | 10th PC                   | Median | 90th PC | 10th PC        | Median   | 90th PC  |
| 90th PC Contrib | DP Sampling | –                         | 75     | –       | 92480.7        | 92654.8  | 92812.1  |
| 90th PC Contrib | DP Greedy   | –                         | 75     | –       | 102544.8       | 102665.7 | 102817.7 |
| 90th PC Contrib | DP Matching | –                         | 75     | –       | 102651.1       | 102784.1 | 102907.8 |
| Max Utility     | Sampling    | –                         | 99     | –       | 95606.9        | 95692.0  | 95750.3  |
| Max Utility     | Greedy      | –                         | 52     | –       | –              | 102543   | –        |
| Max Utility     | Matching    | –                         | 32     | –       | –              | 102685   | –        |
| DP Max Utility  | Sampling    | 89.0                      | 96.0   | 99.0    | 94549.9        | 95394.5  | 95656.5  |
| DP Max Utility  | Greedy      | 26.0                      | 33.0   | 50.0    | 102015.0       | 102253.0 | 102527.0 |
| DP Max Utility  | Matching    | 14.0                      | 18.5   | 30.0    | 102357.0       | 102501.5 | 102671.0 |
| DP Max Utility  | DP Sampling | 88.8                      | 96.0   | 99.0    | 94665.2        | 95375.5  | 95693.5  |
| DP Max Utility  | DP Greedy   | 27.0                      | 34.0   | 53.0    | 102053.2       | 102289.6 | 102531.2 |
| DP Max Utility  | DP Matching | 14.9                      | 18.5   | 28.0    | 102379.7       | 102512.6 | 102643.9 |

Table 4: Reddit: the comparison is for  $\ell_{\max} = 100$ .

| Selection       | Counting    | Person Contribution Bound |        |         | Distinct Count |         |         |
|-----------------|-------------|---------------------------|--------|---------|----------------|---------|---------|
|                 |             | 10th PC                   | Median | 90th PC | 10th PC        | Median  | 90th PC |
| 90th PC Contrib | DP Sampling | –                         | 238    | –       | 95264.5        | 95593.5 | 95966.1 |
| 90th PC Contrib | DP Greedy   | –                         | 238    | –       | 98411.0        | 98734.0 | 99120.0 |
| 90th PC Contrib | DP Matching | –                         | 238    | –       | 98354.2        | 98729.4 | 99164.2 |
| Max Utility     | Sampling    | –                         | 29     | –       | 49907.8        | 50036.5 | 50195.3 |
| Max Utility     | Greedy      | –                         | 29     | –       | –              | 98459   | –       |
| Max Utility     | Matching    | –                         | 19     | –       | –              | 98712   | –       |
| DP Max Utility  | Sampling    | 29.0                      | 29.0   | 29.0    | 49899.6        | 50070.5 | 50220.9 |
| DP Max Utility  | Greedy      | 22.0                      | 25.0   | 29.0    | 98244.0        | 98364.0 | 98459.0 |
| DP Max Utility  | Matching    | 13.0                      | 16.0   | 21.0    | 98586.0        | 98674.0 | 98721.0 |
| DP Max Utility  | DP Sampling | 29.0                      | 29.0   | 29.0    | 49924.2        | 50053.7 | 50211.9 |
| DP Max Utility  | DP Greedy   | 20.0                      | 26.0   | 29.0    | 98126.7        | 98369.6 | 98451.8 |
| DP Max Utility  | DP Matching | 12.0                      | 16.0   | 21.0    | 98555.6        | 98670.4 | 98726.8 |

Table 5: IMDB: the comparison is for  $\ell_{\max} = 30$ .

estimating the distinct count performs much worse than the greedy and matching-based approaches. The greedy approach performs worse than the matching-based approach, but the difference is about 10% for Amazon Fashion and is almost negligible for other data sets since they are much larger. As for the matching-based algorithm, it performs as follows on all the data sets:

1. The algorithm that uses the bound equal to the maximal person contribution overestimates the actual necessary bound. Therefore, we only consider the DP algorithms for counts estimation. It is easy to see that while the median of the estimation is close to the actual distinct count, the amount of noise is somewhat large.
2. The algorithm that uses the bound equal to the 99th percentile of person contributions also overestimates the necessary bound and behaves similarly to the one we just described (though the spread of the noise is a bit smaller).
3. The algorithms that optimize the utility function are considered: one non-private and one private. The non-private algorithm with non-private estimation gives the answer that is very close to the true number of distinct elements. The private algorithm with non-private estimation gives the answer that is worse, but not too much. Finally, the private algorithm with the private estimation gives answers very similar to the results of the non-private estimation.

## References

- Mark Bun and Thomas Steinke. Concentrated differential privacy: Simplifications, extensions, and lower bounds. In *Theory of Cryptography: 14th International Conference, TCC 2016-B, Beijing, China, October 31-November 3, 2016, Proceedings, Part I*, pages 635–658. Springer, 2016. URL <https://arxiv.org/abs/1605.02065>.
- Clément L Canonne, Gautam Kamath, and Thomas Steinke. The discrete gaussian for differential privacy. *Advances in Neural Information Processing Systems*, 33:15676–15688, 2020. URL <https://arxiv.org/abs/2004.00010>.
- Ricardo Silva Carvalho, Ke Wang, and Lovedeep Singh Gondara. Incorporating item frequency for differentially private set union. In *Thirty-Sixth AAAI Conference on Artificial Intelligence, AAAI 2022, Thirty-Fourth Conference on Innovative Applications of Artificial Intelligence, IAAI 2022, The Twelfth Symposium on Educational Advances in Artificial Intelligence, EAAI 2022 Virtual Event, February 22 - March 1, 2022*, pages 9504–9511. AAAI Press, 2022. URL <https://ojs.aaai.org/index.php/AAAI/article/view/21183>.
- Lijie Chen, Badih Ghazi, Ravi Kumar, and Pasin Manurangsi. On distributed differential privacy and counting distinct elements. In James R. Lee, editor, *12th Innovations in Theoretical Computer Science Conference, ITCS 2021, January 6-8, 2021, Virtual Conference*, volume 185 of *LIPIcs*, pages 56:1–56:18. Schloss Dagstuhl - Leibniz-Zentrum für Informatik, 2021. doi: 10.4230/LIPIcs.ITCS.2021.56. URL <https://doi.org/10.4230/LIPIcs.ITCS.2021.56>.
- Damien Desfontaines, Andreas Lochbihler, and David A. Basin. Cardinality estimators do not preserve privacy. *Proc. Priv. Enhancing Technol.*, 2019(2):26–46, 2019. doi: 10.2478/popets-2019-0018. URL <https://doi.org/10.2478/popets-2019-0018>.
- Damien Desfontaines, James Voss, Bryant Gipson, and Chinmoy Mandayam. Differentially private partition selection. *Proc. Priv. Enhancing Technol.*, 2022(1):339–352, 2022. doi: 10.2478/popets-2022-0017. URL <https://doi.org/10.2478/popets-2022-0017>.
- Charlie Dickens, Justin Thaler, and Daniel Ting. Order-invariant cardinality estimators are differentially private. In *NeurIPS*, 2022. URL [http://papers.nips.cc/paper\\_files/paper/2022/hash/623307df18da128262aaf394cdcfb235-Abstract-Conference.html](http://papers.nips.cc/paper_files/paper/2022/hash/623307df18da128262aaf394cdcfb235-Abstract-Conference.html).
- Irit Dinur and Kobbi Nissim. Revealing information while preserving privacy. In *Proceedings of the twenty-second ACM SIGMOD-SIGACT-SIGART symposium on Principles of database systems*, pages 202–210, 2003.
- Cynthia Dwork and Aaron Roth. The algorithmic foundations of differential privacy. *Foundations and Trends® in Theoretical Computer Science*, 9(3–4):211–407, 2014. URL <https://www.cis.upenn.edu/~aaroht/Papers/privacybook.pdf>.
- Cynthia Dwork and Guy N Rothblum. Concentrated differential privacy. *arXiv preprint arXiv:1603.01887*, 2016. URL <https://arxiv.org/abs/1603.01887>.
- Cynthia Dwork, Krishnaram Kenthapadi, Frank McSherry, Ilya Mironov, and Moni Naor. Our data, ourselves: Privacy via distributed noise generation. In *Advances in Cryptology-EUROCRYPT 2006: 24th Annual International Conference on the Theory and Applications of Cryptographic Techniques, St. Petersburg, Russia, May 28-June 1, 2006. Proceedings 25*, pages 486–503. Springer, 2006a.
- Cynthia Dwork, Frank McSherry, Kobbi Nissim, and Adam Smith. Calibrating noise to sensitivity in private data analysis. In *Theory of Cryptography: Third Theory of Cryptography Conference, TCC 2006, New York, NY, USA, March 4-7, 2006. Proceedings 3*, pages 265–284. Springer, 2006b.
- Cynthia Dwork, Moni Naor, Toniann Pitassi, Guy N. Rothblum, and Sergey Yekhanin. Pan-private streaming algorithms. In Andrew Chi-Chih Yao, editor, *Innovations in Computer Science - ICS 2010, Tsinghua University, Beijing, China, January 5-7, 2010. Proceedings*, pages 66–80. Tsinghua University Press, 2010. URL <http://conference.iis.tsinghua.edu.cn/ICS2010/content/papers/6.html>.

271 Badih Ghazi, Ravi Kumar, Jelani Nelson, and Pasin Manurangsi. Private counting of distinct and  
272 k-occurring items in time windows. In Yael Tauman Kalai, editor, *14th Innovations in Theo-*  
273 *retical Computer Science Conference, ITCS 2023, January 10-13, 2023, MIT, Cambridge, Mas-*  
274 *sachusetts, USA*, volume 251 of *LIPIcs*, pages 55:1–55:24. Schloss Dagstuhl - Leibniz-Zentrum  
275 für Informatik, 2023. doi: 10.4230/LIPIcs.ITCS.2023.55. URL [https://doi.org/10.4230/](https://doi.org/10.4230/LIPIcs.ITCS.2023.55)  
276 [LIPIcs.ITCS.2023.55](https://doi.org/10.4230/LIPIcs.ITCS.2023.55).

277 Arpita Ghosh, Tim Roughgarden, and Mukund Sundararajan. Universally utility-maximizing pri-  
278 vacy mechanisms. In *Proceedings of the forty-first annual ACM symposium on Theory of com-*  
279 *puting*, pages 351–360, 2009. URL <https://arxiv.org/abs/0811.2841>.

280 Sivakanth Gopi, Pankaj Gulhane, Janardhan Kulkarni, Judy Hanwen Shen, Milad Shokouhi, and  
281 Sergey Yekhanin. Differentially private set union. In *International Conference on Machine Learn-*  
282 *ing*, pages 3627–3636. PMLR, 2020. URL <https://arxiv.org/abs/2002.09745>.

283 John E. Hopcroft and Richard M. Karp. An  $n^{5/2}$  algorithm for maximum matchings in bipartite  
284 graphs. *SIAM J. Comput.*, 2(4):225–231, 1973. doi: 10.1137/0202019. URL [https://doi.](https://doi.org/10.1137/0202019)  
285 [org/10.1137/0202019](https://doi.org/10.1137/0202019).

286 A.V. Karzanov. An exact estimate of an algorithm for finding a maximum flow, applied to the  
287 problem “on representatives”. *Issues of Cybernetics. Proc. of the Seminar on Combinatorial*  
288 *Mathematics*, pages 66–70, 1973.

289 Shiva Prasad Kasiviswanathan, Homin K Lee, Kobbi Nissim, Sofya Raskhodnikova, and Adam  
290 Smith. What can we learn privately? *SIAM Journal on Computing*, 40(3):793–826, 2011. URL  
291 <https://arxiv.org/abs/0803.0924>.

292 Aleksandra Korolova, Krishnaram Kenthapadi, Nina Mishra, and Alexandros Ntoulas. Releasing  
293 search queries and clicks privately. In Juan Quemada, Gonzalo León, Yoëlle S. Maarek, and  
294 Wolfgang Nejdl, editors, *Proceedings of the 18th International Conference on World Wide Web*,  
295 *WWW 2009, Madrid, Spain, April 20-24, 2009*, pages 171–180. ACM, 2009. doi: 10.1145/  
296 1526709.1526733. URL <https://doi.org/10.1145/1526709.1526733>.

297 Andrew L. Maas, Raymond E. Daly, Peter T. Pham, Dan Huang, Andrew Y. Ng, and Christopher  
298 Potts. Learning word vectors for sentiment analysis. In *Proceedings of the 49th Annual Meeting*  
299 *of the Association for Computational Linguistics: Human Language Technologies*, pages 142–  
300 150, Portland, Oregon, USA, June 2011. Association for Computational Linguistics. URL [http:](http://www.aclweb.org/anthology/P11-1015)  
301 [//www.aclweb.org/anthology/P11-1015](http://www.aclweb.org/anthology/P11-1015).

302 Frank McSherry and Kunal Talwar. Mechanism design via differential privacy. In *48th Annual IEEE*  
303 *Symposium on Foundations of Computer Science (FOCS’07)*, pages 94–103. IEEE, 2007.

304 Lakshmi N. Imdb dataset of 50k movie reviews, 2020. URL [https://www.kaggle.com/](https://www.kaggle.com/datasets/lakshmi25npathi/imdb-dataset-of-50k-movie-reviews)  
305 [datasets/lakshmi25npathi/imdb-dataset-of-50k-movie-reviews](https://www.kaggle.com/datasets/lakshmi25npathi/imdb-dataset-of-50k-movie-reviews).

306 Jianmo Ni, Jiacheng Li, and Julian J. McAuley. Justifying recommendations using distantly-  
307 labeled reviews and fine-grained aspects. In Kentaro Inui, Jing Jiang, Vincent Ng, and Xiao-  
308 jun Wan, editors, *Proceedings of the 2019 Conference on Empirical Methods in Natural Lan-*  
309 *guage Processing and the 9th International Joint Conference on Natural Language Process-*  
310 *ing, EMNLP-IJCNLP 2019, Hong Kong, China, November 3-7, 2019*, pages 188–197. As-  
311 sociation for Computational Linguistics, 2019. doi: 10.18653/v1/D19-1018. URL [https:](https://doi.org/10.18653/v1/D19-1018)  
312 [//doi.org/10.18653/v1/D19-1018](https://doi.org/10.18653/v1/D19-1018).

313 Sofya Raskhodnikova and Adam D. Smith. Efficient lipschitz extensions for high-dimensional graph  
314 statistics and node private degree distributions. *CoRR*, abs/1504.07912, 2015. URL [http://](http://arxiv.org/abs/1504.07912)  
315 [arxiv.org/abs/1504.07912](http://arxiv.org/abs/1504.07912).

316 Adrian Rivera Cardoso and Ryan Rogers. Differentially private histograms under continual obser-  
317 vation: Streaming selection into the unknown. In Gustau Camps-Valls, Francisco J. R. Ruiz, and  
318 Isabel Valera, editors, *Proceedings of The 25th International Conference on Artificial Intelligence*  
319 *and Statistics*, volume 151 of *Proceedings of Machine Learning Research*, pages 2397–2419.  
320 PMLR, 28–30 Mar 2022. URL <https://arxiv.org/abs/2103.16787>.

- 321 Judy Hanwen Shen. Ask reddit, 2020. URL [https://](https://github.com/heyjudes/differentially-private-set-union/tree/ea7b39285dace35cc9e9029692802759f3e1c8e8/data)  
322 [github.com/heyjudes/differentially-private-set-union/tree/](https://github.com/heyjudes/differentially-private-set-union/tree/ea7b39285dace35cc9e9029692802759f3e1c8e8/data)  
323 [ea7b39285dace35cc9e9029692802759f3e1c8e8/data](https://github.com/heyjudes/differentially-private-set-union/tree/ea7b39285dace35cc9e9029692802759f3e1c8e8/data).
- 324 Adam D. Smith, Shuang Song, and Abhradeep Thakurta. The flajolet-martin sketch itself preserves  
325 differential privacy: Private counting with minimal space. In Hugo Larochelle, Marc’Aurelio  
326 Ranzato, Raia Hadsell, Maria-Florina Balcan, and Hsuan-Tien Lin, editors, *Advances in Neural*  
327 *Information Processing Systems 33: Annual Conference on Neural Information Processing Sys-*  
328 *tems 2020, NeurIPS 2020, December 6-12, 2020, virtual*, 2020. URL [https://proceedings.](https://proceedings.neurips.cc/paper/2020/hash/e3019767b1b23f82883c9850356b71d6-Abstract.html)  
329 [neurips.cc/paper/2020/hash/e3019767b1b23f82883c9850356b71d6-Abstract.html](https://proceedings.neurips.cc/paper/2020/hash/e3019767b1b23f82883c9850356b71d6-Abstract.html).
- 330 Marika Swanberg, Damien Desfontaines, and Samuel Haney. DP-SIPS: A simpler, more scalable  
331 mechanism for differentially private partition selection. *CoRR*, abs/2301.01998, 2023. doi: 10.  
332 48550/arXiv.2301.01998. URL <https://doi.org/10.48550/arXiv.2301.01998>.
- 333 Salil Vadhan. The complexity of differential privacy. *Tutorials on the Foundations of Cryptography:*  
334 *Dedicated to Oded Goldreich*, pages 347–450, 2017. URL [https://privacytools.seas.](https://privacytools.seas.harvard.edu/files/privacytools/files/manuscript_2016.pdf)  
335 [harvard.edu/files/privacytools/files/manuscript\\_2016.pdf](https://privacytools.seas.harvard.edu/files/privacytools/files/manuscript_2016.pdf).
- 336 Bing Zhang, Vadym Doroshenko, Peter Kairouz, Thomas Steinke, Abhradeep Thakurta, Ziyin Ma,  
337 Himani Apte, and Jodi Spacek. Differentially private stream processing at scale. *arXiv preprint*  
338 *arXiv:2303.18086*, 2023. URL <https://arxiv.org/abs/2303.18086>.

## 339 A Proofs

340 *Proof of Theorem 1.1.* First note that  $q_\ell(D) = \text{DC}(D; \ell) - \frac{2\ell}{\varepsilon} \log(1/2\beta)$  has sensitivity  $\ell$ . Since the  
341 generalized exponential mechanism is  $\varepsilon/2$ -DP and adding Laplace noise is also  $\varepsilon/2$ -DP, the overall  
342 algorithm is  $\varepsilon$ -DP by composition.

343 Since  $\hat{\nu} \leftarrow q_{\hat{\ell}}(D) + \text{Lap}\left(\frac{2\hat{\ell}}{\varepsilon}\right)$ , we have

$$\mathbb{P}_{\hat{\nu}} \left[ \hat{\nu} \leq q_{\hat{\ell}}(D) + \frac{2\hat{\ell}}{\varepsilon} \log\left(\frac{1}{2\beta}\right) \right] = \mathbb{P}_{\hat{\nu}} \left[ \hat{\nu} \geq q_{\hat{\ell}}(D) - \frac{2\hat{\ell}}{\varepsilon} \log\left(\frac{1}{2\beta}\right) \right] = 1 - \beta. \quad (8)$$

344 Substituting  $q_\ell(D) = \text{DC}(D; \ell) - \frac{2\ell}{\varepsilon} \log(1/2\beta)$  into Equation (8) gives

$$\mathbb{P}_{\hat{\nu}} \left[ \hat{\nu} \leq \text{DC}(D; \hat{\ell}) \right] = \quad (9)$$

$$\mathbb{P}_{\hat{\nu}} \left[ \hat{\nu} \geq \text{DC}(D; \hat{\ell}) - \frac{4\hat{\ell}}{\varepsilon} \log\left(\frac{1}{2\beta}\right) \right] = 1 - \beta. \quad (10)$$

345 Combining Equation (9) with  $\text{DC}(D; \hat{\ell}) \leq \text{DC}(D)$  yields the guarantee in Equation (3) that  $\hat{\nu}$  is a  
346 lower bound on  $\text{DC}(D)$  with probability  $\geq 1 - \beta$ .

347 The accuracy guarantee of the generalized exponential mechanism (Theorem 3.4) is

$$\mathbb{P}_{\hat{\ell}} \left[ q_{\hat{\ell}}(D) \geq \max_{\ell \in [\ell_{\max}]} q_\ell(D) - \ell \cdot \frac{4}{\varepsilon/2} \log(\ell_{\max}/\beta) \right] \geq 1 - \beta$$

348 or, equivalently,

$$\mathbb{P}_{\hat{\ell}} \left[ \text{DC}(D; \hat{\ell}) - \frac{2\hat{\ell}}{\varepsilon} \log\left(\frac{1}{2\beta}\right) \geq \max_{\ell \in [\ell_{\max}]} \text{DC}(D; \ell) - \frac{2\ell}{\varepsilon} \log\left(\frac{1}{2\beta}\right) - \frac{8\ell}{\varepsilon} \log\left(\frac{\ell_{\max}}{\beta}\right) \right] \geq 1 - \beta. \quad (11)$$

349 Combining Equations (10) and (11) with a union bound yields

$$\mathbb{P}_{(\hat{\ell}, \hat{\nu}) \leftarrow \mathcal{M}(D)} \left[ \hat{\nu} \geq \max_{\ell \in [\ell_{\max}]} \text{DC}(D; \ell) - \frac{2\ell + 2\hat{\ell}}{\varepsilon} \log\left(\frac{1}{2\beta}\right) - \frac{8\ell}{\varepsilon} \log\left(\frac{\ell_{\max}}{\beta}\right) \right] \geq 1 - 2\beta. \quad (12)$$

350 To interpret Equation (12) we need a high-probability upper bound on  $\hat{\ell}$ . Let  $A > 0$  be determined  
 351 later and define

$$\ell_A^* := \arg \max_{\ell \in [\ell_{\max}]} \text{DC}(D; \ell) - \frac{A\ell}{\varepsilon}, \quad (13)$$

352 so that  $\text{DC}(D; \ell) \leq \text{DC}(D; \ell_A^*) + (\ell - \ell_A^*) \frac{A}{\varepsilon}$  for all  $\ell \in [\ell_{\max}]$ . Assume the event in Equation (11)  
 353 holds. We have

$$\begin{aligned} \text{DC}(D; \hat{\ell}) - \frac{2\hat{\ell}}{\varepsilon} \log \left( \frac{1}{2\beta} \right) &\leq \text{DC}(D; \ell_A^*) + (\hat{\ell} - \ell_A^*) \frac{A}{\varepsilon} - \frac{2\hat{\ell}}{\varepsilon} \log \left( \frac{1}{2\beta} \right), \quad (\text{by Equation (13)}) \\ \text{DC}(D; \hat{\ell}) - \frac{2\hat{\ell}}{\varepsilon} \log \left( \frac{1}{2\beta} \right) &\geq \max_{\ell \in [\ell_{\max}]} \text{DC}(D; \ell) - \frac{2\ell}{\varepsilon} \log \left( \frac{1}{2\beta} \right) - \frac{8\ell}{\varepsilon} \log \left( \frac{\ell_{\max}}{\beta} \right) \\ &\quad (\text{by assumption}) \\ &\geq \text{DC}(D; \ell_A^*) - \frac{2\ell_A^*}{\varepsilon} \log \left( \frac{1}{2\beta} \right) - \frac{8\ell_A^*}{\varepsilon} \log \left( \frac{\ell_{\max}}{\beta} \right). \end{aligned}$$

354 Combining inequalities and simplifying yields

$$\hat{\ell} \cdot \left( 2 \log \left( \frac{1}{2\beta} \right) - A \right) \leq \ell_A^* \cdot \left( 2 \log \left( \frac{1}{2\beta} \right) + 8 \log \left( \frac{\ell_{\max}}{\beta} \right) - A \right). \quad (14)$$

355 Now we set  $A = \log \left( \frac{1}{2\beta} \right)$  to obtain

$$\hat{\ell} \cdot \log \left( \frac{1}{2\beta} \right) \leq \ell_A^* \cdot \left( \log \left( \frac{1}{2\beta} \right) + 8 \log \left( \frac{\ell_{\max}}{\beta} \right) \right). \quad (15)$$

356 Substituting Equation (15) into Equation (12) gives

$$\mathbb{P}_{(\hat{\ell}, \hat{v}) \leftarrow \mathcal{M}(D)} \left[ \hat{v} \geq \max_{\ell \in [\ell_{\max}]} \text{DC}(D; \ell) - \frac{2\ell + 2\ell_A^*}{\varepsilon} \log \left( \frac{1}{2\beta} \right) - \frac{8\ell + 16\ell_A^*}{\varepsilon} \log \left( \frac{\ell_{\max}}{\beta} \right) \right] \geq 1 - 2\beta. \quad (16)$$

357 We simplify Equation (16) using  $\log \left( \frac{1}{2\beta} \right) \leq \log \left( \frac{\ell_{\max}}{\beta} \right)$  to obtain Equation (4).

358 Finally, the runtime of  $\text{DPDISTINCTCOUNT}(D)$  is dominated by  $\ell_{\max}$  calls to the  
 359  $\text{SENSITIVEDISTINCTCOUNT}(D)$  subroutine, which computes the maximum size of a bipartite  
 360 matching on a graph with  $|E| = \sum_{i \in [n]} |u_i| \cdot \min\{\ell, |u_i|\} \leq |D| \cdot \ell_{\max}$  edges and  $|V| + |U| =$   
 361  $\text{DC}(D) + \sum_{i \in [n]} \min\{\ell, |u_i|\} \leq 2|D|$  vertices. The Hopcroft-Karp-Karzanov algorithm runs in  
 362 time  $O(|E| \cdot \sqrt{|V| + |U|}) \leq O(|D|^{1.5} \cdot \ell_{\max})$  time.  $\square$

363 *Proof of Theorem 1.2.* We start from proving privacy guarantees. Note that Algo-  
 364 rithm 2 produces the same result as Algorithm 4. Hence, it is enough to prove that  
 365  $\text{SENSITIVEAPPROXDISTINCTCOUNT}(\cdot, \ell)$  has sensitivity  $\ell$ . In addition, note that

$$\begin{aligned} \text{SENSITIVEAPPROXDISTINCTCOUNT}((u_1, \dots, u_n), \ell) = \\ \text{SENSITIVEAPPROXDISTINCTCOUNT}(\underbrace{(u_1, \dots, u_n, \dots, u_1, \dots, u_n)}_{\ell \text{ times}}, 1); \end{aligned}$$

366 therefore, it is enough to prove that  $\text{SENSITIVEAPPROXDISTINCTCOUNT}(\cdot, 1)$  has sensitivity 1.

367 Assume  $D' = (u_1, \cdot, u_{j-1}, u_{j+1}, \dots, u_n)$  and let  $S_1, \dots, S_n, v_1, \dots, v_n$  be states of  $S$  and  
 368  $v$  ( $v_i = \perp$  if  $i$  is skipped), respectively, when run  $\text{APPROXSENSITIVEDISTINCTCOUNT}(D)$  and  
 369  $S'_1, \dots, S'_n, v'_1, \dots, v'_n$  be states of  $S$  and  $v$  ( $v_i = \perp$  if  $i$  is skipped), respectively, when run  
 370  $\text{APPROXSENSITIVEDISTINCTCOUNT}(D')$ . Let  $\{i_1, \dots, i_k\} = \{i : S_i \neq S'_i\}$ . It is clear that  
 371  $i_1 \geq j$  and  $v'_{i_1} = v_j$ ; similarly  $v'_{i_2}$  is either  $\perp$  or  $v'_{i_2} = v_{i_1}$  etc. As a result  $|S'_n| \leq |S_n| \leq |S'_n| + 1$ .

372 The sensitivity bound implies that  $q_\ell(D) = |S| - \frac{2\ell}{\varepsilon} \log(1/2\beta)$  has sensitivity  $\ell$ . Since the gen-  
 373 eralized exponential mechanism is  $\varepsilon/2$ -DP and adding Laplace noise is also  $\varepsilon/2$ -DP, the overall  
 374 algorithm is  $\varepsilon$ -DP by composition.

---

**Algorithm 4** Approximate Distinct Count Algorithm

---

```

1: procedure SENSITIVEAPPROXDISTINCTCOUNT( $D = (u_1, \dots, u_n) \in (\Omega^*)^n; \ell \in \mathbb{N}$ )
2:    $S \leftarrow \emptyset$ .
3:   for  $\ell' \in [\ell]$  do
4:     for  $i \in [n]$  with  $u_i \setminus S \neq \emptyset$  do
5:       Choose lexicographically first  $v \in u_i \setminus S$ . ▷ Match  $(i, \ell)$  to  $v$ .
6:       Update  $S \leftarrow S \cup \{v\}$ .
7:     end for
8:   end for
9:   return  $|S|$ 
10: end procedure
11: procedure DPAPPROXDISTINCTCOUNT( $D = (u_1, \dots, u_n) \in (\Omega^*)^n; \ell_{\max} \in \mathbb{N}, \varepsilon > 0, \beta \in (0, \frac{1}{2})$ )
12:   for  $\ell \in [\ell_{\max}]$  do
13:     Define  $q_\ell(D) := \text{SENSITIVEAPPROXDISTINCTCOUNT}(D; \ell) - \frac{2\ell}{\varepsilon} \cdot \log\left(\frac{1}{2\beta}\right)$ .
14:   end for
15:    $\hat{\ell} \leftarrow \text{GEM}(D; \{q_\ell\}_{\ell \in [\ell_{\max}]}, \{\ell\}_{\ell \in [\ell_{\max}]}, \varepsilon/2, \beta)$ . ▷ Algorithm 3
16:    $\hat{\nu} \leftarrow q_{\hat{\ell}}(D) + \text{Lap}\left(2\hat{\ell}/\varepsilon\right)$ .
17:   return  $(\hat{\ell}, \hat{\nu}) \in [\ell_{\max}] \times \mathbb{R}$ .
18: end procedure

```

---

375 Let us denote by  $\widehat{\text{DC}}(D; \ell)$  the value of  $|S|$  we obtain on Line 8 in Algorithm 2. Note that  $\widehat{\text{DC}}(D; \ell)$   
376 is size of a maximal matching in  $G_\ell$ , where  $G_\ell$  is the bipartite graph corresponding to the input  $D$   
377 with  $\ell$  copies of each person (see Algorithm 1 for a formal description of the graph). Since a maximal  
378 matching is a 2-approximation to a maximum matching, we have  $\widehat{\text{DC}}(D; \ell) \geq \frac{1}{2}\text{DC}(D; \ell)$ . Also  
379  $\widehat{\text{DC}}(D; \ell) \leq \text{DC}(D; \ell)$ .

380 Since  $\hat{\nu} \leftarrow q_{\hat{\ell}}(D) + \text{Lap}\left(2\hat{\ell}/\varepsilon\right)$ , we have

$$\mathbb{P}_{\hat{\nu}} \left[ \hat{\nu} \leq q_{\hat{\ell}}(D) + \frac{2\hat{\ell}}{\varepsilon} \log\left(\frac{1}{2\beta}\right) \right] = \mathbb{P}_{\hat{\nu}} \left[ \hat{\nu} \geq q_{\hat{\ell}}(D) - \frac{2\hat{\ell}}{\varepsilon} \log\left(\frac{1}{2\beta}\right) \right] = 1 - \beta. \quad (17)$$

381 Substituting  $q_\ell(D) = \widehat{\text{DC}}(D; \ell) - \frac{2\ell}{\varepsilon} \log(1/2\beta)$  into Equation (17) gives

$$\mathbb{P}_{\hat{\nu}} \left[ \hat{\nu} \leq \widehat{\text{DC}}(D; \hat{\ell}) \right] = \quad (18)$$

$$\mathbb{P}_{\hat{\nu}} \left[ \hat{\nu} \geq \widehat{\text{DC}}(D; \hat{\ell}) - \frac{4\hat{\ell}}{\varepsilon} \log\left(\frac{1}{2\beta}\right) \right] = 1 - \beta. \quad (19)$$

382 Combining Equation (18) with  $\widehat{\text{DC}}(D; \hat{\ell}) \leq \text{DC}(D)$  yields the guarantee in Equation (6) that  $\hat{\nu}$  is a  
383 lower bound on  $\text{DC}(D)$  with probability  $\geq 1 - \beta$ .

384 The accuracy guarantee of the generalized exponential mechanism (Theorem 3.4) is

$$\mathbb{P}_{\hat{\ell}} \left[ q_{\hat{\ell}}(D) \geq \max_{\ell \in [\ell_{\max}]} q_\ell(D) - \ell \cdot \frac{4}{\varepsilon/2} \log(\ell_{\max}/\beta) \right] \geq 1 - \beta$$

385 or, equivalently,

$$\mathbb{P}_{\hat{\ell}} \left[ \widehat{\text{DC}}(D; \hat{\ell}) - \frac{2\hat{\ell}}{\varepsilon} \log\left(\frac{1}{2\beta}\right) \geq \max_{\ell \in [\ell_{\max}]} \widehat{\text{DC}}(D; \ell) - \frac{2\ell}{\varepsilon} \log\left(\frac{1}{2\beta}\right) - \frac{8\ell}{\varepsilon} \log\left(\frac{\ell_{\max}}{\beta}\right) \right] \geq 1 - \beta. \quad (20)$$

386 Combining Equations (19) and (20) with a union bound yields

$$\mathbb{P}_{(\hat{\ell}, \hat{\nu}) \leftarrow \mathcal{M}(D)} \left[ \hat{\nu} \geq \max_{\ell \in [\ell_{\max}]} \widehat{\text{DC}}(D; \ell) - \frac{2\ell + 2\hat{\ell}}{\varepsilon} \log\left(\frac{1}{2\beta}\right) - \frac{8\ell}{\varepsilon} \log\left(\frac{\ell_{\max}}{\beta}\right) \right] \geq 1 - 2\beta. \quad (21)$$

387 To interpret Equation (21) we need a high-probability upper bound on  $\hat{\ell}$ . Let  $A > 0$  be determined  
 388 later and define

$$\ell_A^* := \arg \max_{\ell \in [\ell_{\max}]} \widehat{\text{DC}}(D; \ell) - \frac{A\ell}{\varepsilon}, \quad (22)$$

389 so that  $\widehat{\text{DC}}(D; \ell) \leq \widehat{\text{DC}}(D; \ell_A^*) + (\ell - \ell_A^*) \frac{A}{\varepsilon}$  for all  $\ell \in [\ell_{\max}]$ . Assume the event in Equation (20)  
 390 holds. We have

$$\begin{aligned} \widehat{\text{DC}}(D; \hat{\ell}) - \frac{2\hat{\ell}}{\varepsilon} \log \left( \frac{1}{2\beta} \right) &\leq \widehat{\text{DC}}(D; \ell_A^*) + (\hat{\ell} - \ell_A^*) \frac{A}{\varepsilon} - \frac{2\hat{\ell}}{\varepsilon} \log \left( \frac{1}{2\beta} \right), \quad (\text{by Equation (22)}) \\ \widehat{\text{DC}}(D; \hat{\ell}) - \frac{2\hat{\ell}}{\varepsilon} \log \left( \frac{1}{2\beta} \right) &\geq \max_{\ell \in [\ell_{\max}]} \widehat{\text{DC}}(D; \ell) - \frac{2\ell}{\varepsilon} \log \left( \frac{1}{2\beta} \right) - \frac{8\ell}{\varepsilon} \log \left( \frac{\ell_{\max}}{\beta} \right) \\ &\quad (\text{by assumption}) \\ &\geq \widehat{\text{DC}}(D; \ell_A^*) - \frac{2\ell_A^*}{\varepsilon} \log \left( \frac{1}{2\beta} \right) - \frac{8\ell_A^*}{\varepsilon} \log \left( \frac{\ell_{\max}}{\beta} \right). \end{aligned}$$

391 Combining inequalities and simplifying yields

$$\hat{\ell} \cdot \left( 2 \log \left( \frac{1}{2\beta} \right) - A \right) \leq \ell_A^* \cdot \left( 2 \log \left( \frac{1}{2\beta} \right) + 8 \log \left( \frac{\ell_{\max}}{\beta} \right) - A \right). \quad (23)$$

392 Now we set  $A = \log \left( \frac{1}{2\beta} \right)$  to obtain

$$\hat{\ell} \cdot \log \left( \frac{1}{2\beta} \right) \leq \ell_A^* \cdot \left( \log \left( \frac{1}{2\beta} \right) + 8 \log \left( \frac{\ell_{\max}}{\beta} \right) \right). \quad (24)$$

393 Substituting Equation (15) into Equation (21) gives

$$\mathbb{P}_{(\hat{\ell}, \hat{\nu}) \leftarrow \mathcal{M}(D)} \left[ \hat{\nu} \geq \max_{\ell \in [\ell_{\max}]} \widehat{\text{DC}}(D; \ell) - \frac{2\ell + 2\ell_A^*}{\varepsilon} \log \left( \frac{1}{2\beta} \right) - \frac{8\ell + 16\ell_A^*}{\varepsilon} \log \left( \frac{\ell_{\max}}{\beta} \right) \right] \geq 1 - 2\beta. \quad (25)$$

394 We simplify Equation (25) using  $\log \left( \frac{1}{2\beta} \right) \leq \log \left( \frac{\ell_{\max}}{\beta} \right)$  to obtain

$$\mathbb{P}_{(\hat{\ell}, \hat{\nu}) \leftarrow \widehat{\mathcal{M}}(D)} \left[ \hat{\nu} \geq \max_{\ell \in [\ell_{\max}]} \widehat{\text{DC}}(D; \ell) - \frac{10\ell + 18\ell_A^*}{\varepsilon} \log \left( \frac{\ell_{\max}}{\beta} \right) \right] \geq 1 - 2\beta. \quad (26)$$

395 Note that  $\widehat{\text{DC}}(D; \ell) \geq \frac{1}{2} \text{DC}(D; \ell)$ ; hence,

$$\mathbb{P}_{(\hat{\ell}, \hat{\nu}) \leftarrow \widehat{\mathcal{M}}(D)} \left[ \hat{\nu} \geq \max_{\ell \in [\ell_{\max}]} \frac{1}{2} \text{DC}(D; \ell) - \frac{10\ell + 18\ell_A^*}{\varepsilon} \log \left( \frac{\ell_{\max}}{\beta} \right) \right] \geq 1 - 2\beta.$$

396 Finally, note that  $\ell_A^* \leq \ell_*$ ; therefore, we proved Equation (7).

397 It only remains to verify that Algorithm 2 can be implemented in  $O(|D|)$  time. We can implement  
 398  $S$  using a hash table to ensure that we can add an element or query membership of an element in  
 399 constant time. (We can easily maintain a counter for the size of  $S$ .) We assume  $D$  is presented as  
 400 a linked list of linked lists representing each  $u_i$  and furthermore that the linked lists  $u_i$  are sorted  
 401 in lexicographic order. The outer loop proceeds through the linked list for  $D = (u_1, \dots, u_n)$ . For  
 402 each  $u_i$ , we simply pop elements from the linked list and check if they are in  $S$  until either we find  
 403  $v \in u_i \setminus S$  (and add  $v$  to  $S$ ) or  $u_i$  becomes empty (in which case we remove it from the linked list  
 404 for  $D$ .) Since each iteration decrements  $|D|$ , the runtime is  $O(|D|)$ .  $\square$
